# Supplementary material for: Phthalocyanine supported dinuclear LnIIIcomplexes: the solvent-induced change of magnetic properties in dysprosium(iii) analogues
Source: Royal Society of Chemistry journal article supplement (doi:10.1039/c7dt00298j), 2017-01-01
Supplement: c7dt00298j1.pdf [file c7dt00298j1.pdf]

## Supporting Information

### **Phthalocyanine supported dinuclear Ln<sup>III</sup> complexes: the solvent-induced change of magnetic properties in dysprosium(III) analogue**

Jing-Yuan Ge, Hai-Ying Wang, Jing Li, Jia-Ze Xie, You Song and Jing-Lin Zuo\*

*State Key Laboratory of Coordination Chemistry, School of Chemistry and Chemical  
Engineering, Collaborative Innovation Center of Advanced Microstructures, Nanjing  
University, Nanjing 210023, P. R. China*

---

\* Email: zuojl@nju.edu.cn. Fax: +86-25-89682309. Nanjing University.

**Table S1** Selected bond lengths (Å) and bond angles (°) for **1–3**

|                  | <b>1</b> (Sm <sub>2</sub> -C <sub>6</sub> H <sub>6</sub> ) | <b>2</b> (Tb <sub>2</sub> -C <sub>6</sub> H <sub>6</sub> ) | <b>3</b> (Dy <sub>2</sub> -C <sub>6</sub> H <sub>6</sub> ) |
|------------------|------------------------------------------------------------|------------------------------------------------------------|------------------------------------------------------------|
| Bond Lengths (Å) |                                                            |                                                            |                                                            |
| Ln1—O1           | 2.300 (3)                                                  | 2.255(3)                                                   | 2.249(3)                                                   |
| Ln1—O2           | 2.281 (3)                                                  | 2.250(3)                                                   | 2.235(3)                                                   |
| Ln1—N1           | 2.674 (4)                                                  | 2.641(5)                                                   | 2.628(5)                                                   |
| Ln1—N1A          | 2.649 (4)                                                  | 2.613(5)                                                   | 2.606(5)                                                   |
| Ln1—N3           | 2.655(3)                                                   | 2.618(3)                                                   | 2.601(4)                                                   |
| Ln1—Ln1A         | 3.6109 (6)                                                 | 3.5383(6)                                                  | 3.5121(7)                                                  |
| Bond Angles (°)  |                                                            |                                                            |                                                            |
| O2—Ln1—O2B       | 73.85 (17)                                                 | 74.52 (16)                                                 | 74.65 (19)                                                 |
| O2—Ln1—O1        | 80.29 (11)                                                 | 79.24 (12)                                                 | 78.78 (13)                                                 |
| O2—Ln1—O1B       | 123.18 (11)                                                | 123.22 (12)                                                | 122.95 (14)                                                |
| O1—Ln1—O1B       | 73.16 (17)                                                 | 74.70 (17)                                                 | 75.04(19)                                                  |
| O2—Ln1—N3        | 139.76 (8)                                                 | 140.06 (8)                                                 | 140.20(10)                                                 |
| O1—Ln1—N3        | 139.56 (8)                                                 | 140.30 (8)                                                 | 140.63(10)                                                 |
| O2—Ln1—N3A       | 83.25 (9)                                                  | 82.78 (10)                                                 | 82.75(11)                                                  |
| O1—Ln1—N3A       | 83.52 (10)                                                 | 82.82 (10)                                                 | 82.79(11)                                                  |
| N3—Ln1—N3A       | 94.31 (13)                                                 | 94.97 (14)                                                 | 95.06(16)                                                  |
| O2—Ln1—N1A       | 142.66 (8)                                                 | 142.41 (8)                                                 | 142.37(9)                                                  |
| O1—Ln1—N1A       | 81.04 (11)                                                 | 81.15 (12)                                                 | 81.36(13)                                                  |
| N3—Ln1—N1A       | 62.70 (7)                                                  | 63.12 (7)                                                  | 63.21(8)                                                   |
| O2—Ln1—N1        | 81.59 (11)                                                 | 81.45 (12)                                                 | 81.38(13)                                                  |
| O1—Ln1—N1        | 142.91 (9)                                                 | 142.26 (8)                                                 | 142.17(10)                                                 |
| N3—Ln1—N1        | 62.70 (7)                                                  | 62.74 (7)                                                  | 62.91 (8)                                                  |
| N1A—Ln1—N1       | 94.57 (12)                                                 | 95.34 (13)                                                 | 95.70 (15)                                                 |
| O2—Ln1—Ln1A      | 118.35 (7)                                                 | 118.31 (8)                                                 | 118.39 (10)                                                |
| O1—Ln1—Ln1A      | 118.46 (8)                                                 | 118.47 (8)                                                 | 118.66 (10)                                                |
| N3—Ln1—Ln1A      | 47.15 (7)                                                  | 47.48 (7)                                                  | 47.53 (8)                                                  |
| N1A—Ln1—Ln1AA    | 47.58 (9)                                                  | 48.01 (10)                                                 | 48.12 (12)                                                 |
| N1—Ln1—Ln1A      | 46.99 (10)                                                 | 47.34 (10)                                                 | 47.59 (11)                                                 |
| Ln1A—N1—Ln1      | 85.43 (12)                                                 | 84.66 (13)                                                 | 84.30 (15)                                                 |

|             |            |            |            |
|-------------|------------|------------|------------|
| Ln1—N3—Ln1A | 85.69 (13) | 85.03 (14) | 84.94 (16) |
|-------------|------------|------------|------------|

Symmetry codes: (A)  $-x+1, -y+1, -z$ ; (B)  $x, -y+1, z$ .

**Table S2** Crystal data and structure refinement for **1'** [S1]

|                                  | <b>1'</b>                                                                     |
|----------------------------------|-------------------------------------------------------------------------------|
| Empirical formula                | C <sub>76</sub> H <sub>92</sub> N <sub>8</sub> O <sub>8</sub> Sm <sub>2</sub> |
| Formula weight                   | 1546.29                                                                       |
| Crystal system                   | Triclinic                                                                     |
| Space group                      | <i>P</i> $\bar{1}$                                                            |
| <i>a</i> (Å)                     | 12.941(6)                                                                     |
| <i>b</i> (Å)                     | 14.680(4)                                                                     |
| <i>c</i> (Å)                     | 21.205(4)                                                                     |
| $\alpha$ (°)                     | 88.22(2)                                                                      |
| $\beta$ (°)                      | 86.54(3)                                                                      |
| $\gamma$ (°)                     | 71.32(3)                                                                      |
| <i>V</i> (Å <sup>3</sup> )       | 3808.94                                                                       |
| <i>Z</i>                         | 2                                                                             |
| $\rho$ calc (g/cm <sup>3</sup> ) | 1.267                                                                         |
| F(000)                           | 1400                                                                          |

**Table S3** Fitting of the Cole-Cole plots for **3** with a generalized Debye model in the temperature range 2.6–6.8 K under 1000 Oe dc field.

| T / K | $\chi_s / \text{cm}^3 \text{mol}^{-1}$ | $\chi_T / \text{cm}^3 \text{mol}^{-1}$ | $\alpha$ |
|-------|----------------------------------------|----------------------------------------|----------|
| 2.6   | 0.380                                  | 12.8                                   | 0.39     |
| 2.8   | 0.481                                  | 11.7                                   | 0.37     |
| 3.0   | 0.551                                  | 10.7                                   | 0.34     |
| 3.2   | 0.586                                  | 9.83                                   | 0.32     |
| 3.4   | 0.652                                  | 9.12                                   | 0.29     |
| 3.6   | 0.651                                  | 8.60                                   | 0.29     |
| 3.8   | 0.700                                  | 8.12                                   | 0.28     |
| 4.0   | 0.707                                  | 7.81                                   | 0.28     |
| 4.2   | 0.732                                  | 7.42                                   | 0.29     |
| 4.4   | 0.853                                  | 7.04                                   | 0.29     |

|     |       |      |      |
|-----|-------|------|------|
| 4.6 | 0.980 | 6.75 | 0.28 |
| 4.8 | 1.17  | 6.44 | 0.27 |
| 5.0 | 1.24  | 6.17 | 0.26 |
| 5.2 | 1.42  | 5.90 | 0.25 |
| 5.4 | 1.52  | 5.69 | 0.25 |
| 5.6 | 1.59  | 5.48 | 0.26 |
| 5.8 | 1.73  | 5.29 | 0.25 |
| 6.2 | 1.87  | 4.95 | 0.23 |
| 6.8 | 1.10  | 4.50 | 0.18 |

**Table S4** Fitting of the Cole-Cole plots for **3'** with an extended Debye model in the temperature range 3.6–7.2 K under 2000 Oe dc field.

| T / K | $\chi_T / \text{cm}^3 \text{mol}^{-1}$ | $\chi_0 / \text{cm}^3 \text{mol}^{-1}$ | $\ln \tau_1$ | $\alpha_1$ | $\ln \tau_2$ | $\alpha_2$ |
|-------|----------------------------------------|----------------------------------------|--------------|------------|--------------|------------|
| 3.6   | 6.06                                   | 0.94                                   | -5.01        | 0.27       | -1.90        | 0.04       |
| 3.9   | 6.01                                   | 0.94                                   | -6.06        | 0.25       | -2.28        | 0.13       |
| 4.2   | 5.75                                   | 0.86                                   | -6.94        | 0.25       | -2.76        | 0.15       |
| 4.5   | 5.45                                   | 0.72                                   | -7.89        | 0.29       | -3.27        | 0.18       |
| 4.8   | 5.06                                   | 0.01                                   | -9.15        | 0.45       | -3.79        | 0.13       |
| 5.1   | 4.79                                   | 0.00                                   |              |            | -4.41        | 0.11       |
| 5.7   | 4.37                                   | 2.19                                   |              |            | -5.96        | 0.26       |
| 6.0   | 4.14                                   | 2.23                                   |              |            | -6.74        | 0.19       |
| 6.3   | 3.92                                   | 2.21                                   |              |            | -7.36        | 0.15       |
| 6.6   | 3.76                                   | 2.16                                   |              |            | -7.94        | 0.15       |
| 7.0   | 3.60                                   | 2.09                                   |              |            | -8.61        | 0.13       |
| 7.2   | 3.47                                   | 1.83                                   |              |            | -9.43        | 0.17       |

**Table S5** Fitting of the Cole-Cole plots for **3-re** with a generalized Debye model in the temperature range 3.0–5.6 K under 1000 Oe dc field.

| T / K | $\chi_s / \text{cm}^3 \text{mol}^{-1}$ | $\chi_T / \text{cm}^3 \text{mol}^{-1}$ | $\alpha$ |
|-------|----------------------------------------|----------------------------------------|----------|
| 3.0   | 0.671                                  | 11.1                                   | 0.35     |
| 3.6   | 0.787                                  | 8.99                                   | 0.29     |
| 4.0   | 0.803                                  | 8.08                                   | 0.28     |

|     |      |      |      |
|-----|------|------|------|
| 4.6 | 1.06 | 6.98 | 0.28 |
| 5.0 | 1.32 | 6.39 | 0.27 |
| 5.6 | 1.72 | 5.69 | 0.26 |

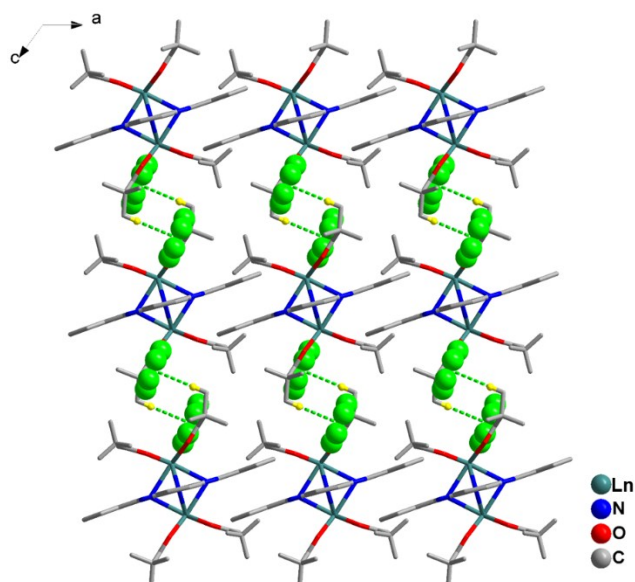

**Fig. S1** The benzene molecules lie in crystal lattice regularly in complexes **1–3**. The C–H··· $\pi$  interactions and benzene molecules are shown in green dashed lines and space-filling model, respectively.

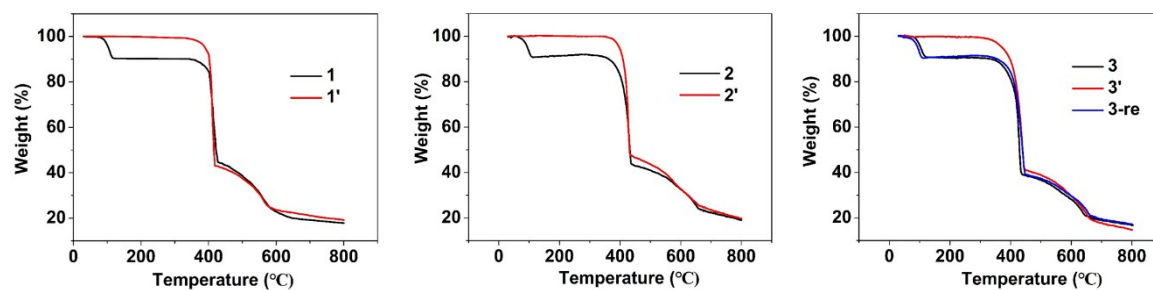

**Fig. S2** TGA curves for complexes **1–3**, **1'–3'** and **3-re**.

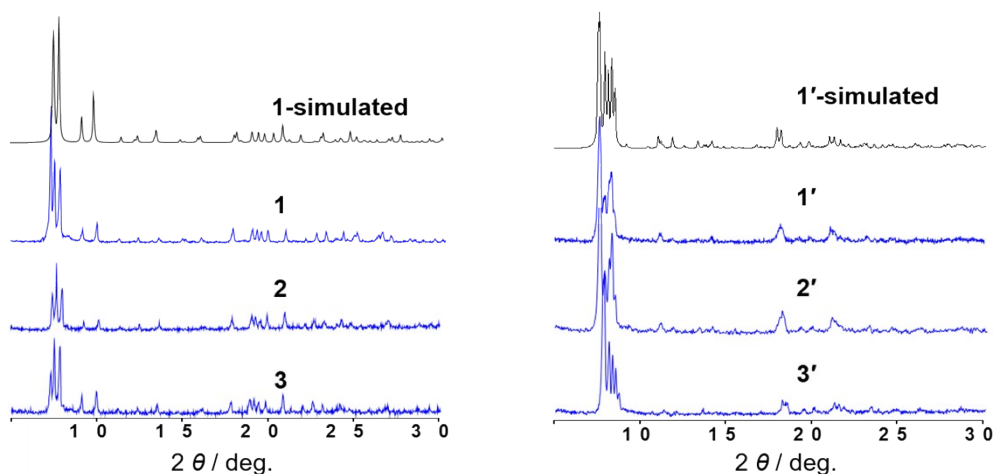

**Fig. S3** PXRD patterns. Black: simulated PXRD pattern based on Sm complexes **1** and **1'**. Blue: measured PXRD patterns based on **1–3** and **1'–3'**.

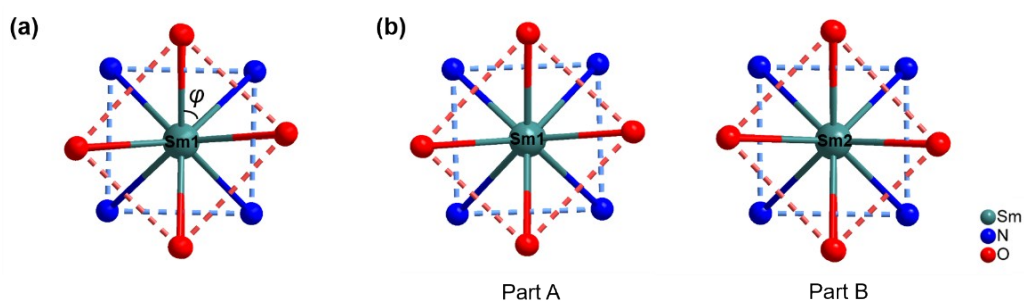

**Fig. S4** Some structural parameters change after desolvation, and there are also some different parameters between part A and part B, especially the twist angle  $\varphi$ . Taking two Sm complexes for example, three  $\varphi$  values in the order of this graphics are 42.87 (Sm1 for **1**), 42.02 (Sm1 of **1'**) and 44.19 (Sm2 of **1'**), respectively.

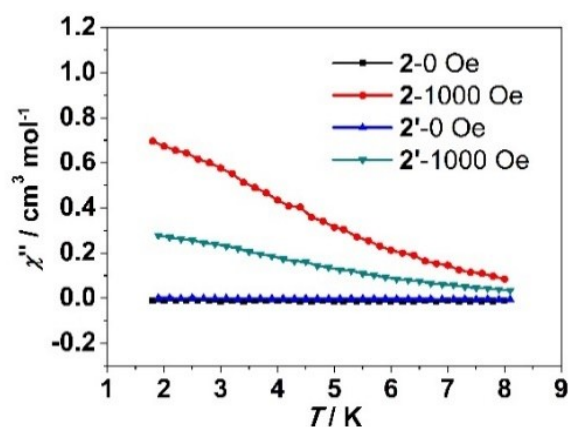

**Fig. S5** Temperature dependence of the  $\chi''$  ac susceptibilities at 999 Hz under zero and 1000 Oe dc field for **2** and **2'**.

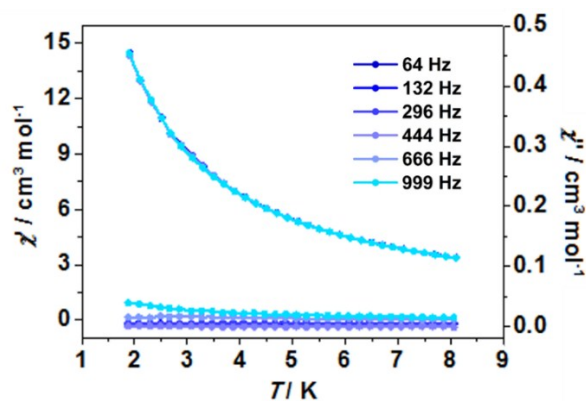

**Fig. S6** Temperature dependence of the  $\chi'$  and  $\chi''$  ac susceptibilities at indicated frequencies under zero dc field for **3**.

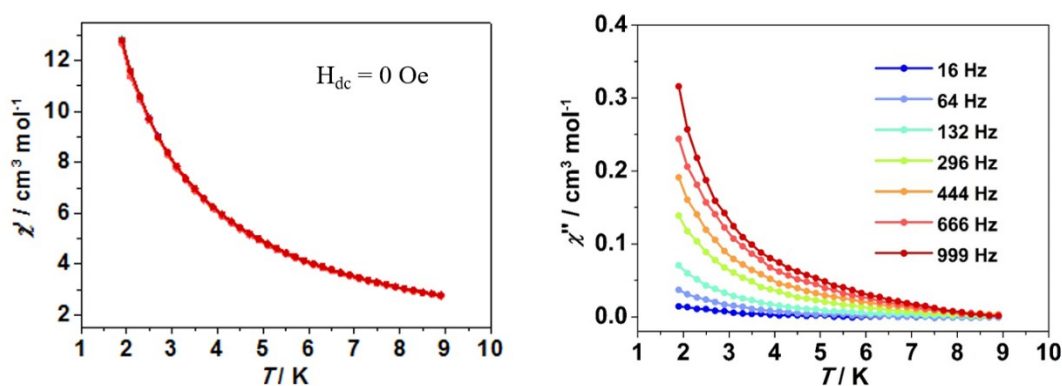

**Fig. S7** Temperature dependence of the  $\chi'$  and  $\chi''$  ac susceptibilities at indicated frequencies under zero dc field for **3'**.

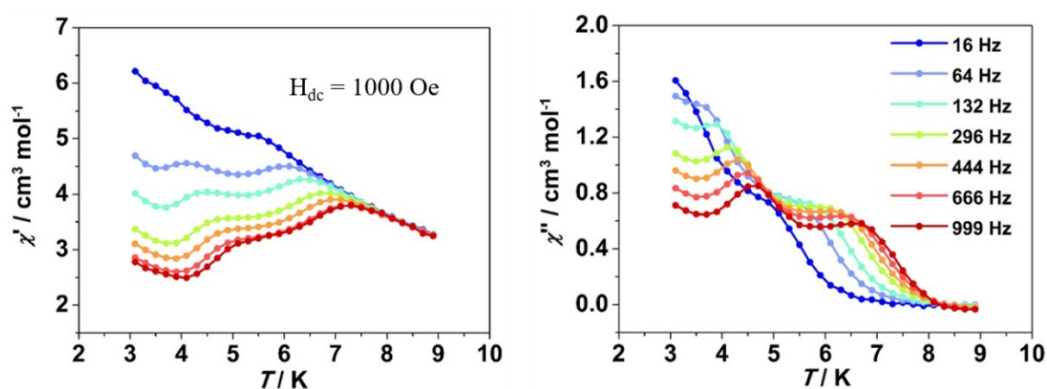

**Fig. S8** Temperature dependence of the  $\chi'$  and  $\chi''$  ac susceptibilities at indicated frequencies under 1000 Oe dc field for **3'**.

## Reference

[S1] H. Sugimoto, T. Higashi, A. Maeda, M. Mori, H. Masuda and T. Taga, *J. Chem. Soc. Chem. Commun.*, 1983, 1234-1235.
